# Supplementary material for: Neurodevelopment in preschool children exposed and unexposed to Zika virus in utero in Nicaragua: a prospective cohort study
Source: PubMed Central journal article supplement — Lancet Glob Health. Author manuscript; Available in PMC 2024 Jul 31. (PMC11289744; doi:10.1016/s2214-109x(24)00176-1), 2024-07
Supplement: NIHMS2002139-supplement-1.pdf [file NIHMS2002139-supplement-1.pdf]

# THE LANCET

## Global Health

### Supplementary appendix 1

This translation in Spanish was submitted by the authors and we reproduce it as supplied. It has not been peer reviewed. *The Lancet's* editorial processes have only been applied to the original in English, which should serve as reference for this manuscript.

Los autores nos proporcionaron esta traducción al español y la reproducimos tal como nos fue entregada. No la hemos revisado. Los procesos editoriales de *The Lancet* se han aplicado únicamente al original en inglés, que debe servir de referencia para este manuscrito.

Supplement to: Max R, Toval-Ruiz C, Becker-Dreps S, et al. Neurodevelopment in preschool children exposed and unexposed to Zika virus in utero in Nicaragua: a prospective cohort study. *Lancet Glob Health* 2024; **12**: e1129–38.

## Resumen

**Antecedentes.** El conocimiento sobre el desarrollo neurológico, a largo plazo, en niños normocéfalos (nacidos con una circunferencia de la cabeza normal) expuestos al virus del Zika en el útero es escaso. El objetivo de este estudio fue comparar los niveles de desarrollo neurológico, hasta los 48 meses de edad, en niños normocéfalos, expuestos y no-expuestos al virus del Zika en el útero.

**Métodos.** Este es un estudio de cohorte prospectivo e incluye niños normocéfalos nacidos en León y Managua, Nicaragua, durante la epidemia de Zika del 2016. En León, fueron elegibles todas las mujeres embarazadas durante dos períodos de captación. En Managua, se incluyeron parejas madre-hijo de tres diferentes distritos incluyendo todas las mujeres embarazadas antes del 15 de junio del 2016 y que tenían como fecha de parto el 15 de septiembre del 2016 o después. Los niños se clasificaron serológicamente como expuestos o no-expuestos al virus del Zika durante su vida fetal y se inició el seguimiento prospectivo hasta los 48 meses de edad. A los 36 y 48 meses de edad, se administró la escala de Mullen para el aprendizaje temprano (MSEL por sus siglas en inglés). La medida del resultado primario, definido como el nivel (puntaje) de aprendizaje temprano (ELC, por sus siglas en inglés), se realizó a los 30 a 48 meses en León y a los 36 a 48 meses en Managua. Utilizamos un modelo de ecuaciones de estimación generalizadas con ponderación de probabilidad inversa para evaluar el efecto de la exposición al virus del Zika en el puntaje (nivel) individual de los dominios cognitivos del MSEL y los puntajes ELC ajustados por educación y edad materna, estado de pobreza y sexo del bebé.

**Hallazgos.** El período de captación para la cohorte de León fue entre el 31 de enero y el 5 de abril de 2017 y el segundo fue entre el 30 de agosto del 2017 y el 22 de febrero de 2018. El período de captación para la cohorte de Managua fue entre el 24 de octubre del 2019 y 5 de mayo del 2020. Se captaron 478 madres (482 niños) de la cohorte de León y 615 madres (609 niños) de la cohorte de Managua, de las cuales 622 niños (303 de la cohorte de León; 319 de la cohorte de Managua) se incluyeron en la evaluación final; cuatro niños (dos de cada cohorte) tenían microcefalia al nacer y por lo tanto fueron excluidos de los análisis. En total 33 (11%) de los 303 niños captados en León y 219 (69%) de los 319 niños captados en Managua estuvieron expuestos al virus del Zika en el útero. En ambas cohortes, no se identificaron diferencias significativas entre los niveles promedio (ajustados) del ELC en niños expuestos y no-expuestos al virus del Zika a los 36 meses (la diferencia entre grupos fue de 1,2 [IC del 95%: -4.2 a 6.5] en la cohorte de León y 2,8 [-2.4 a 8.1] en la cohorte de Managua) o a los 48 meses (-0,9 [-10.8 a 8.8] en la cohorte de León y 0.1 [-5.1 a 5.2] en la cohorte de Managua). Ninguna diferencia en los niveles del ELC entre los bebés expuestos y no expuestos al virus del Zika superó los 6 puntos en ningún momento entre los 30 y los 48 meses en León o entre los 36 y los 48 meses en Managua, lo que se considera clínicamente significativo en otros entornos.

**Interpretación.** No encontramos diferencias significativas entre los niveles de desarrollo neurológico de niños normocéfalos con exposición al virus del Zika en el útero y niños no expuestos al virus del Zika a los 36 o 48 meses de edad. Estos hallazgos son prometedores y apoyan la hipótesis de un típico desarrollo neurológico en niños normocéfalos expuestos al virus del Zika, aunque se justifica un seguimiento e investigaciones adicionales.

**Financiamiento** Instituto Nacional de Salud y Desarrollo Infantil (NIHCD por sus siglas en inglés), Instituto Nacional de Alergias y Enfermedades Infecciosas (NIAID NIHCD por sus siglas en inglés) y Centro Fogarty Internacional.
